# Supplementary material for: A High Wind Associated with Bow Echo Mesovortex over Cimenyan, Indonesia
Source: Research Square preprint supplement (doi:10.21203/rs.3.rs-3424786/v1), 2023-10-10
Supplement: Supplementary file 1 [file 56f1db1e08589e1066fcf20e.docx]

**Appendix**

In this case study, we try to explain the phenomenon of the emergence of high winds (56 km h-1) associated with the bow echoes recorded by weather radar data and WRF models in Cimenyan, Indonesia, using the green function since an analytic model is difficult to solve.

*Derivation of the Green Function*

We find the Green function as follows first express the Green function as the double of the Fourier series,

(A.1)

Thus, we determine *Bmn*,

(A.2)

Using orthogonality properties, we arrive,

(A.3)

Thus, we calculate the derivative as follows,

and the second derivative yields,

Derive the Green function Eq. (1) concerning *z*,

The second derivative yields,

Substituting into the Green equation Eq. (3) yields,

Thus, we arrange the equation as follows,

we can rewrite it as,

(A.4)

we arrange,

(A.5)

Thus, we get,

(A.6)

Substituting Eq. (A.3), yields,

(A.7)

Finally, we have the complete Green function of Eq. (A.1). In the derivation of the Green function, we usually use the orthogonality properties,
