# Supplementary material for: A High Wind Associated with Bow Echo Mesovortex over Cimenyan, Indonesia
Source: Research Square preprint supplement (doi:10.21203/rs.3.rs-3424786/v1), 2023-10-10
Supplement: Supplementary file 2 [file b359774adb8ce811dc9b19b1.docx]

*Asia-Pacific Journal of Atmospheric Science*

**A High Wind Associated with Bow Echo Mesovortex in Cimenyan, Bandung, Indonesia**

Erma Yulihastin1, Ibnu Fathrio1, Ginaldi Ari Nugroho1, Albertus Sulaiman1, Asif Awaludin1, Suaydhi1,2, Tiin Sinatra1, Halimurrahman1, and Haries Satyawardhana1

1Research Center for Climate and Atmosphere, National Research and Innovation Agency, Bandung, Indonesia

2Swinburne University of Technology, Melbourne, Australia

erma.yulihastin@brin.go.id


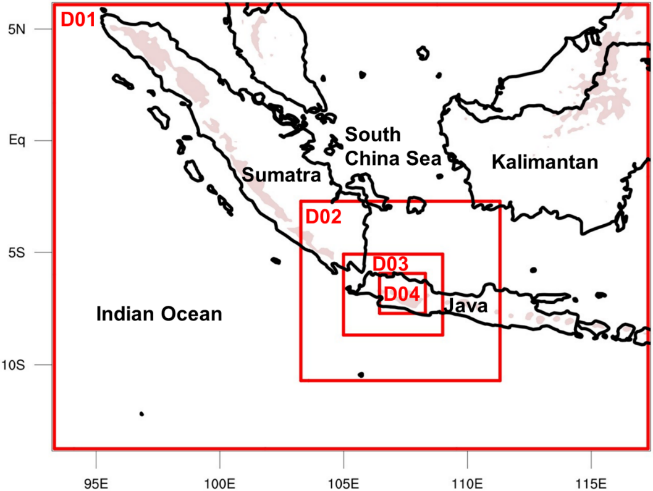


**Figure S1.** Configuration of model domains for simulating a bow echo meso-γ-vortex over Cimenyan, Bandung City, West Java province, Indonesia. The red boxes indicate the first (D01), second (D02), third (D03), and fourth (D04) domains, having horizontal resolutions of 9, 3, 1, and 0.5 km, respectively. The third and fourth domains represented West Java and Bandung regions. The pink color shaded indicated a rugged topography in the whole domain.

**Table S1.** Configuration of the Weather and Research Forecasting model for simulating severe damaging wind associated with bow-echo activity over Cimenyan, Bandung, Indonesia, at horizontal resolutions of 9 km (D01), 3 km (D02), 1 km (D03), and 0.5 km (D04).

| Region | D01 | D02 | D03 | D04 |
| --- | --- | --- | --- | --- |
| Horizontal grids | 300 × 250 | 301 × 301 | 451 × 409 | 421 × 409 |
| Grid spacing (km) | 9 | 3 | 1 | 0.5 |
| Cumulus scheme | Betts–Miller–Janjic | Betts–Miller–Janjic | No-scheme | No-scheme |
| Vertical grid | 60 layers | 60 layers | 60 layers | 60 layers |
| Radiation | RRTMG longwave scheme  RRTMG shortwave scheme | RRTMG longwave scheme  RRTMG shortwave scheme | RRTMG longwave scheme  RRTMG shortwave scheme | RRTMG longwave scheme  RRTMG shortwave scheme |
| Microphysics | WSM 6 | WSM 6 | WSM 6 | WSM 6 |
| Surface layer  Land surface | Revised MM5 Monin-Obukhov  Unified Noah land-surface model | Revised MM5 Monin-Obukhov  Unified Noah land-surface model | Revised MM5 Monin-Obukhov  Unified Noah land-surface model | Revised MM5 Monin-Obukhov  Unified Noah land-surface model |
| PBL  Initial boundary condition | Yonsei University  FNL | Yonsei University  FNL | Yonsei University  FNL | Yonsei University  FNL |


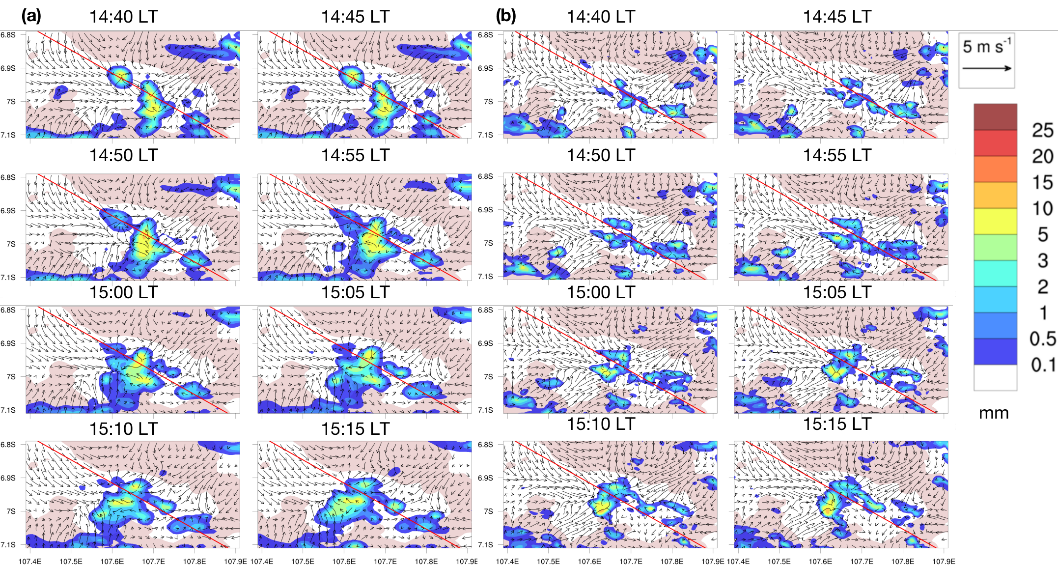


**Fig. S2.** (a) Evolution of simulated precipitation and surface wind (10 m) for 1 km spatial resolution on 28 March 2021 from 13:04–16:34 LT. The pink shade was considered a rugged topography. (b) Same as (a), but for simulated 0.5 km spatial resolution from 14:40–15:15 LT. The red line represents the transect line for further analysis in Figs. 10–12.


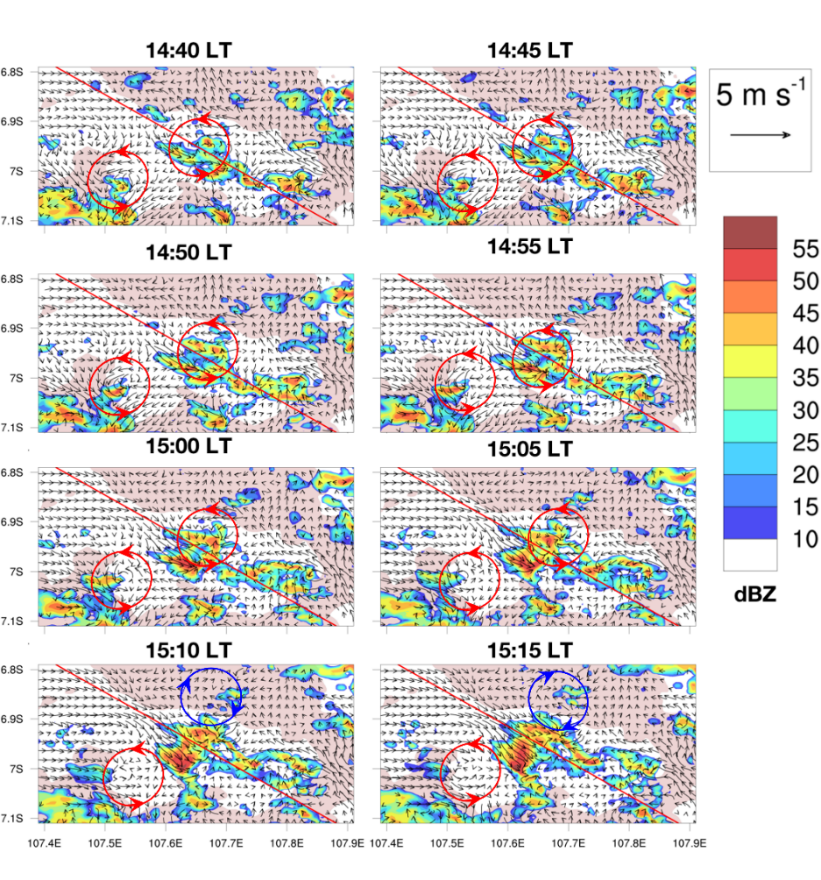


**Fig. S3.** Same as Fig. S2, but for a detailed evolution of simulated reflectivity (shaded) and wind vector at 2 km AGL from 14:40 to 15:15 LT.


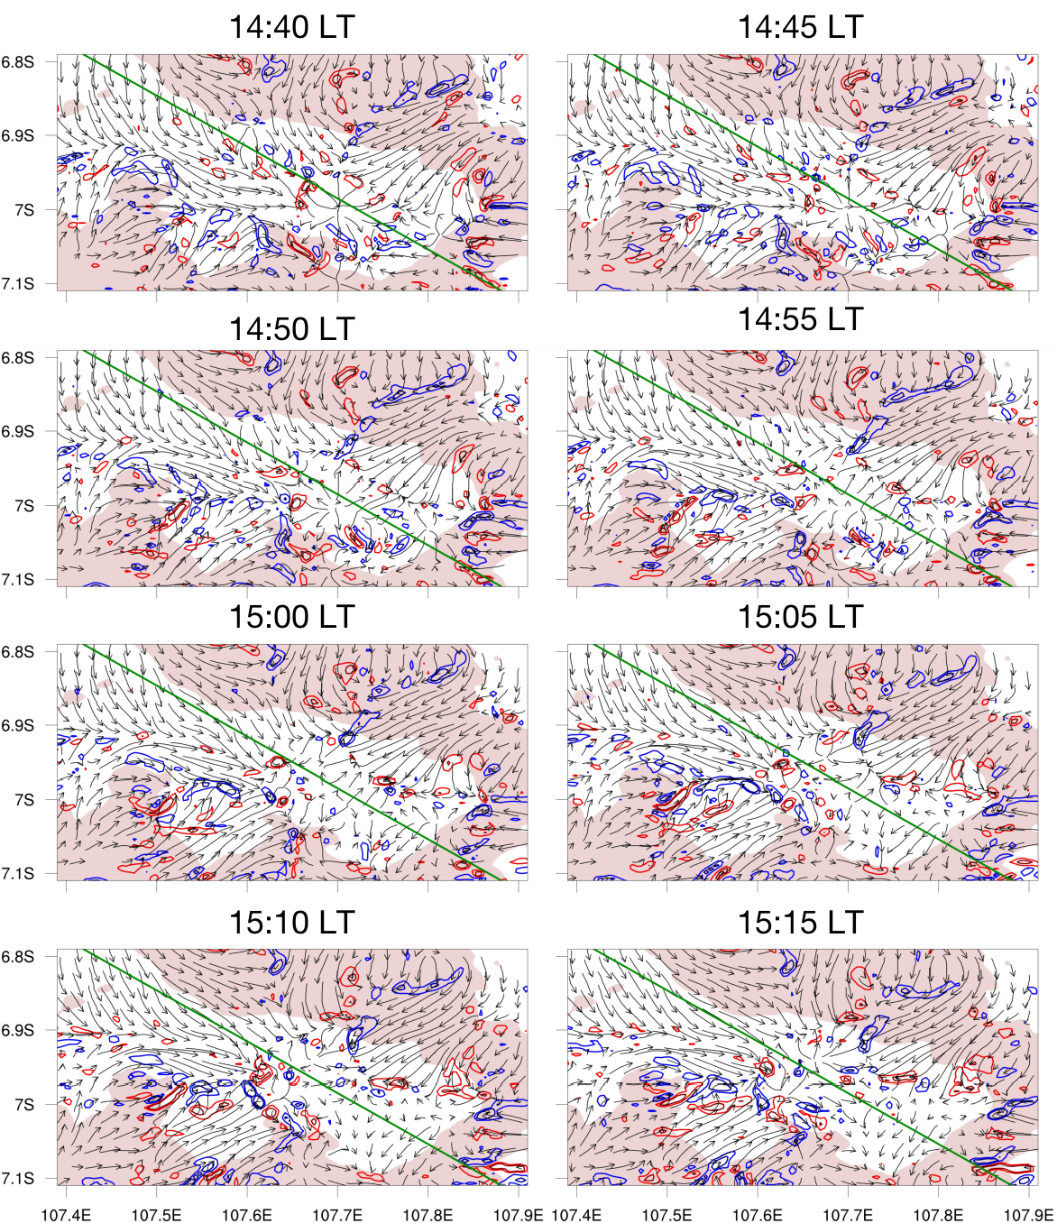


**Fig. S4.** Same as Fig. S3, but for simulated horizontal wind vectors (m s-1) and vertical vorticity (anomalous shaded as blue (negative) and red (positive), s-1) at 20 m AGL.

**Fig. S5.** Time evolution from 13:00 to 17:00 LT on 28 March 2021 for (a) surface temperature, differences among several heights, (b) wind shear and cloud base levels for (c) lifting condensation level (LCL), and (d) convective available potential energy (CAPE). The cloud base was described as 4 categories: surface-base (SB), mean layer (ML), most unstable (MU), and downdraft unstable (DU).

**Text S1. Analytical Model of Mesoscale Convective Vortex**

Mesoscale convective vortex (MCV) is a complicated phenomenon, so an analytic model is difficult to solve. Theoretical studies with analytical models are usually used together with complex numerical models to obtain a physical picture of certain mechanisms in the MCV. In this case study, we try to explain the phenomenon of the emergence of high winds (56 km h-1) associated with the bow echoes recorded by weather radar data and WRF models in Cimenyan, Indonesia (Fig. S6).


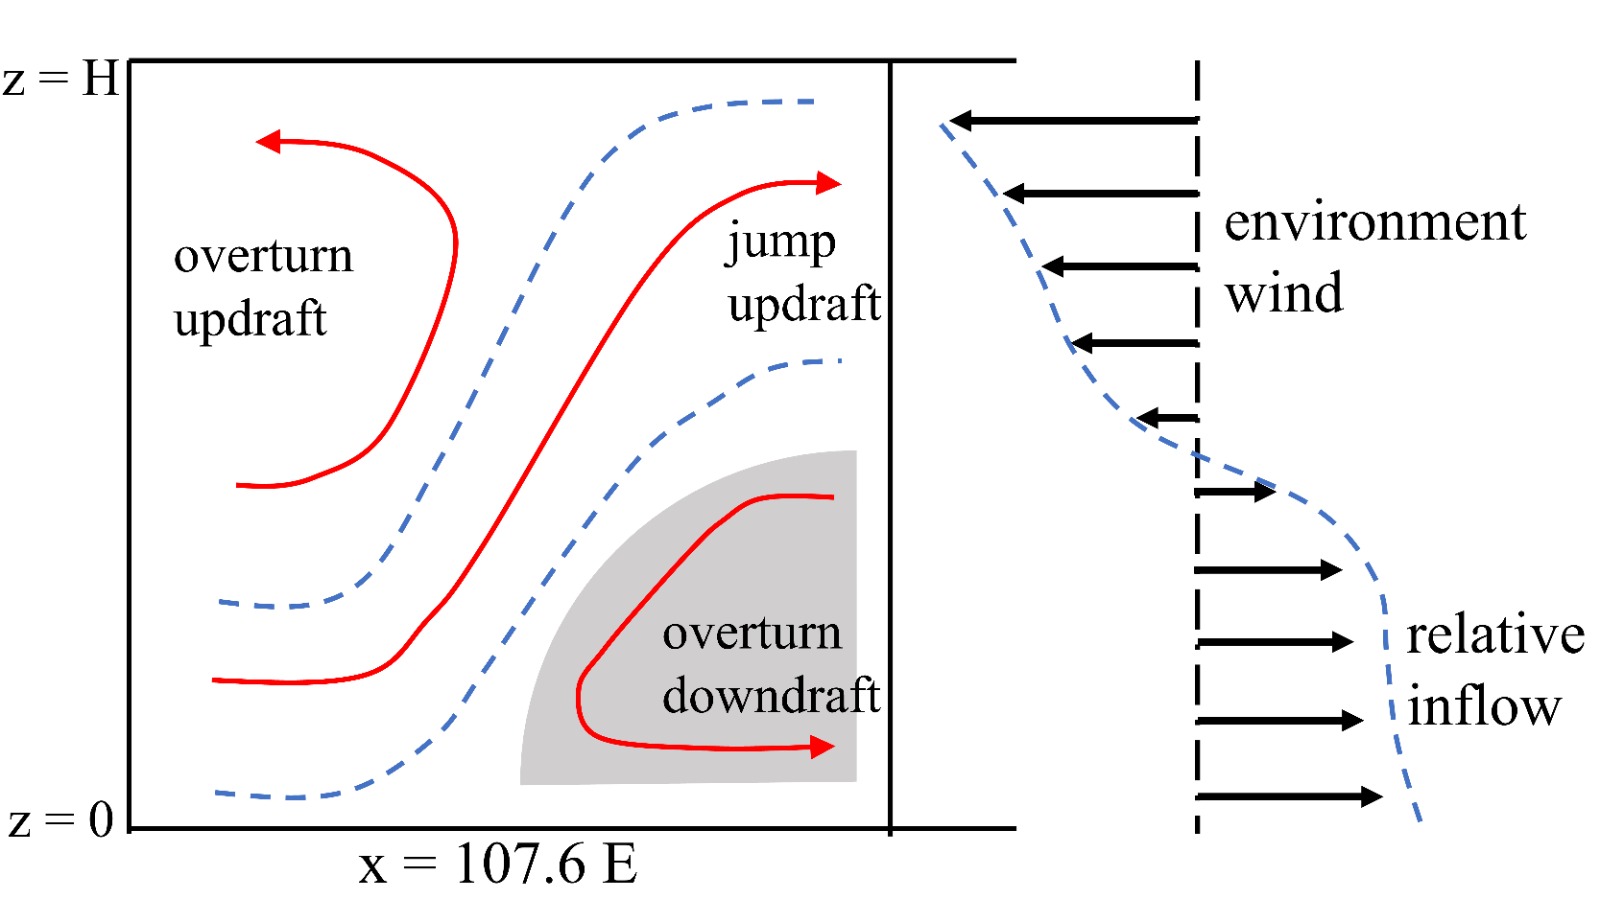


**Fig. S6.** The vertical structure of the Mesoscale Convective Vortex over Cimenyan, Bandung, Indonesia, corresponds to meso-γ-vortex A in Figure 10 (modifying from Moncrieff et al., 1972).

Here, we formulated a steady two-dimensional model of organized convection in shear using the horizontal vorticity equation [1], [2].

(1)

where *ψ* is a stream function, *Hs* is the scale height of the air density in the environment, *η=∂u/∂z-∂w/∂x* is the y-component of the vorticity, and ‘0’ denotes condition at the altitude z*0*. B is the buoyancy, *u0(z)=U(z)-c,* with *U(z)* as the environmental wind profile. We seek to derive the stream function from the vorticity equation with a given input of *B(𝑧0, 𝑧)* and *U(𝑧)*. A general solution can be obtained by the Green function methods, as follows,

(2)

where,

(3)

Subject to the boundary condition,

(4)

The Green function is given by (see Appendix A for detail derivation),

(5)

where

(6)

Solving the convolution integration,

(7)

**References:**

[1] Moncrieff, M. W., and J. S. A. Green, 1972: The propagation and transfer properties of steady convective overturning in shear. Quart. J. Roy. Meteor. Soc., 98, 336–352.

[2] Zhang, M., 2022: An analytical model of two-dimensional mesoscale circulation and associated properties across squall lines. AGU Advances, 3, e2022AV000726. https://doi.org/10.1029/2022AV000726.

[3] Kythe, P.K., 2011: Green’s functions and linear differential equations: theory, applications, and computation, CRC Press, New York.
